# Supplementary material for: Validation of aerosol backscatter profiles from Raman lidar and ceilometer using balloon-borne measurements
Source: Copernicus journal article supplement (doi:10.5194/acp-21-2267-2021), 2021-02-16
Supplement: Supplementary file 1 [file acp-21-2267-2021-supplement.pdf]

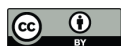

*Supplement of*

## **Validation of aerosol backscatter profiles from Raman lidar and ceilometer using balloon-borne measurements**

**Simone Brunamonti et al.**

*Correspondence to:* Francisco Navas-Guzmán ([francisco.navasguzman@meteoswiss.ch](mailto:francisco.navasguzman@meteoswiss.ch))

The copyright of individual parts of the supplement might differ from the CC BY 4.0 License.

| Date of COBALD sounding | Host radiosonde | Remote sensing data |
|-------------------------|-----------------|---------------------|
| 2014, 22 January        | SRS-C34         | CHM15K              |
| 2014, 20 March          | SRS-C34         | CHM15K              |
| 2014, 17 July           | SRS-C34         | CHM15K              |
| 2014, 28 October        | SRS-C34         | CHM15K              |
| 2014, 19 November       | SRS-C34         | CHM15K              |
| 2015, 15 April          | SRS-C34         | CHM15K              |
| 2015, 12 May            | SRS-C34         | CHM15K              |
| 2015, 11 June           | SRS-C34         | CHM15K              |
| 2015, 4 August          | SRS-C34         | CHM15K              |
| 2015, 2 October         | SRS-C34         | CHM15K              |
| 2015, 10 November       | SRS-C34         | CHM15K              |
| 2016, 6 April           | SRS-C34         | RALMO, CHM15K       |
| 2016, 3 May             | SRS-C34         | CHM15K              |
| 2016, 17 May            | SRS-C34         | RALMO, CHM15K       |
| 2016, 28 June           | SRS-C34         | RALMO, CHM15K       |
| 2016, 23 August         | SRS-C34         | RALMO, CHM15K       |
| 2016, 29 November       | SRS-C34         | RALMO, CHM15K       |
| 2017, 11 July           | SRS-C34         | RALMO, CHM15K       |
| 2017, 22 August         | SRS-C34         | RALMO, CHM15K       |
| 2018, 12 July           | RS41            | RALMO, CHM15K       |
| 2018, 28 August         | RS41            | RALMO, CHM15K       |
| 2018, 4 September       | RS41            | RALMO, CHM15K       |
| 2018, 30 October        | RS41            | CHM15K              |
| 2019, 5 March           | RS41            | RALMO, CHM15K       |
| 2019, 19 March          | RS41            | RALMO, CHM15K       |
| 2019, 30 April          | RS41            | RALMO, CHM15K       |
| 2019, 25 June           | RS41            | CHM15K              |
| 2019, 12 September      | RS41            | RALMO, CHM15K       |
| 2019, 17 September      | RS41            | RALMO, CHM15K       |
| 2019, 19 September      | RS41            | RALMO, CHM15K       |
| 2019, 10 October        | RS41            | RALMO, CHM15K       |

**Table S1. List of dates of all COBALD soundings used for the statistical comparison, including information on host radiosonde model (MeteoLabor SRS-C34 or Vaisala RS41) and simultaneously available remote sensing data (RALMO and/or CHM15K).**

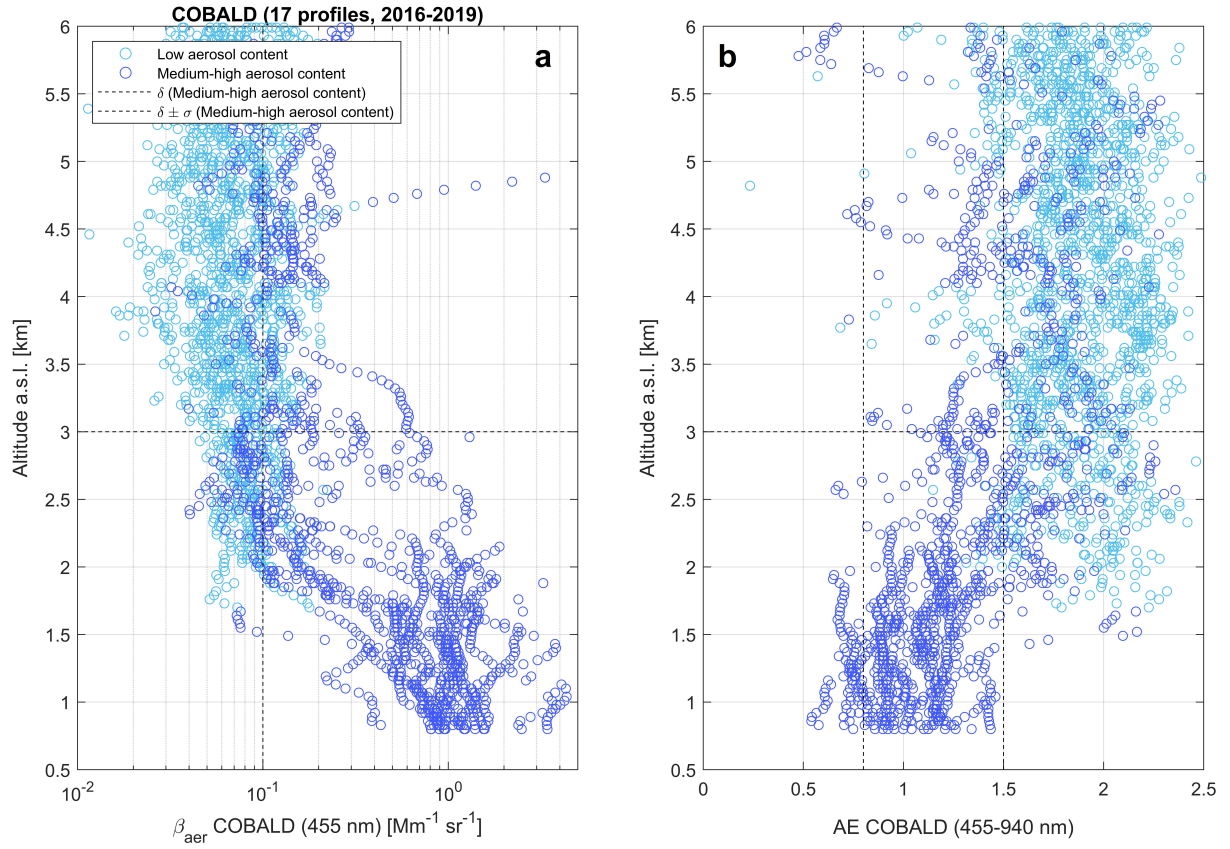

**Figure S1.** Panel (a): all medium-migh aerosol content (dark blue circles) and low aerosol content (light blue circles) data points of the COBALD aerosol backscatter coefficient ( $\beta_{aer}$ ) at 455 nm, as function of altitude. The 0.1  $\text{Mm}^{-1} \text{sr}^{-1}$  threshold in COBALD  $\beta_{aer}$ , separating low from medium-high aerosol content data at 455 nm (as described in Section 3.3), is shown by a vertical black dashed line. Panel (b): same as Panel (a), for COBALD-derived Angstrom exponent (AE) between 455-940 nm. Vertical black dashed lines indicate the thresholds of AE = 0.8 and AE = 1.5 used for the parameterization of the correction factors (see Section 3.2).

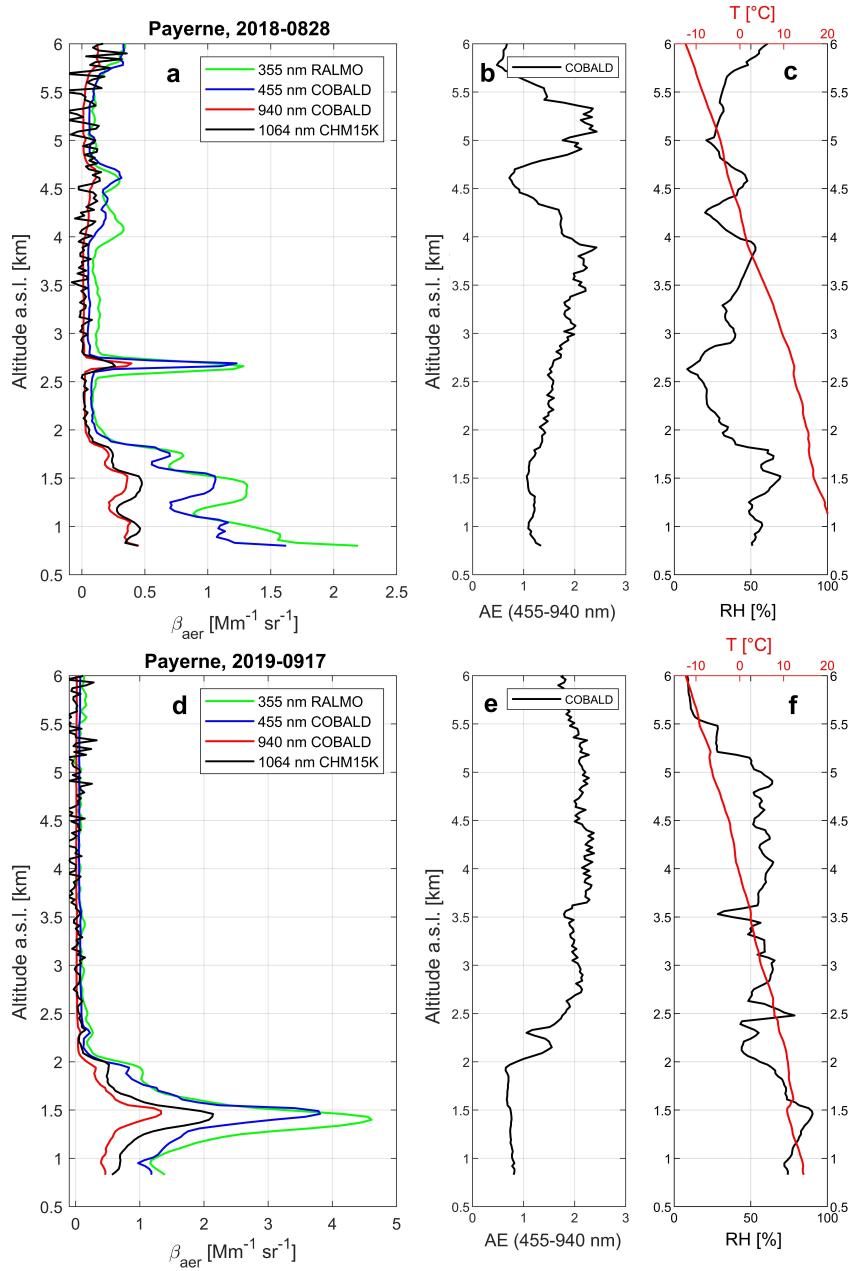

**Figure S2.** Overview of selected profiles measured on 28 August 2018 (Panels a-c) and 19 September 2019 (Panels d-f). Panels (a, c): vertical profiles of aerosol backscatter coefficient ( $\beta_{aer}$ ) as function of altitude, measured by RALMO (355 nm, green), COBALD (455 nm, blue and 940 nm, red) and CHM15K (1064 nm, black). Panels (b, d): vertical profiles of Angstrom exponent (AE) for wavelengths 455-940 nm, calculated from the COBALD data. Panels (c, f): vertical profiles of relative humidity (RH, black) and temperature (red, top scale) measured by the Vaisala RS41-SGP radiosonde (flying in tandem with the COBALD sonde).



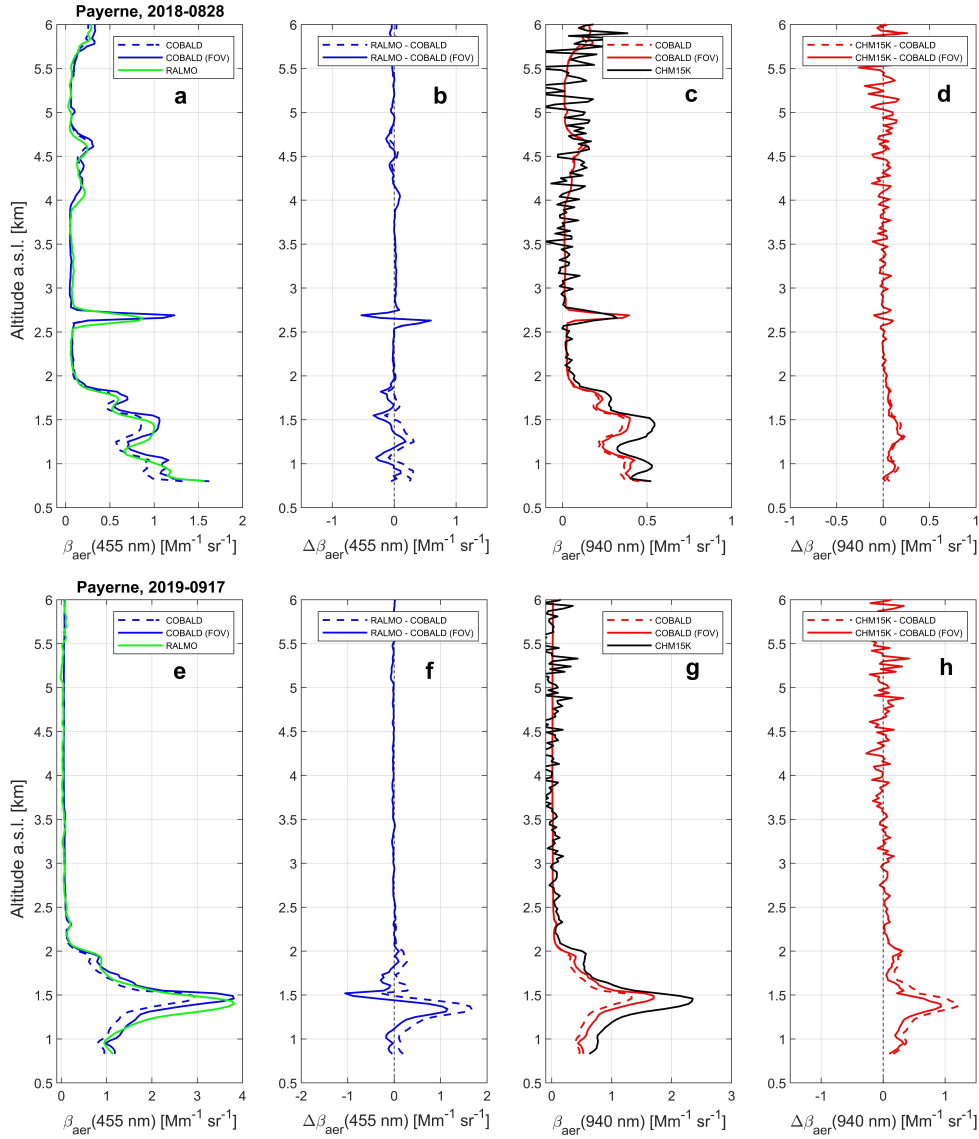

**Figure S3. Quantitative comparison of RALMO vs. COBALD (Panels a-b, e-f) and CHM15K vs. COBALD (Panels c-d, g-h) for the selected profiles measured on 28 August 2018 (Panels a-d) and 19 September 2019 (Panels e-h). Panels (a, e): vertical profiles of aerosol backscatter coefficient ( $\beta_{aer}$ ) at 455 nm measured by RALMO (green) and COBALD (blue), both without (dashed) and with (solid) application of the FOV correction. Panels (b, f): vertical profiles of the RALMO – COBALD difference in  $\beta_{aer}$  ( $\Delta\beta_{aer}$ ) at 455 nm, both without (dashed) and with (solid) application of the FOV correction. Panels (c, g): vertical profiles of  $\beta_{aer}$  at 940 nm measured by CHM15K (black) and COBALD (red), both without (dashed) and with (solid) FOV correction. Panels (d, h): vertical profiles of  $\Delta\beta_{aer}$  for CHM15k – COBALD at 940 nm, both without (dashed) and with (solid) FOV correction.**
